# Supplementary material for: Stereochemistry and amyloid inhibition: Asymmetric triplex metallohelices enantioselectively bind to Aβ peptide
Source: PubMed Central journal article supplement — Sci Adv. 2018 Jan 19;4(1):eaao6718. doi: 10.1126/sciadv.aao6718 (PMC5775025; doi:10.1126/sciadv.aao6718), 2018-01-19
Supplement: aao6718_SM.pdf [file aao6718_SM.pdf]

## Supplementary Materials for

### **Stereochemistry and amyloid inhibition: Asymmetric triplex metallohelices enantioselectively bind to A $\beta$ peptide**

Yijia Guan, Zhi Du, Nan Gao, Yue Cao, Xiaohui Wang, Peter Scott, Hualong Song, Jinsong Ren, Xiaogang Qu

Published 19 January 2018, *Sci. Adv.* **4**, eaao6718 (2018)  
DOI: 10.1126/sciadv.aao6718

#### **This PDF file includes:**

- fig. S1. Influence of these metal complexes on the fluorescence of ECFP (a non-A $\beta$  fusion system).
- fig. S2. The influence of these metallohelices on the fluorescence of ThT.
- fig. S3. Aggregation kinetics of A $\beta$ 42 monitored by ThT assay in the absence or presence of A1 and B4.
- fig. S4. Aggregation kinetics of A $\beta$ 40 monitored by ThT assay in the absence or presence of the ligands of A1 and B4.
- fig. S5. The inhibition effect of A1 and B4 on A $\beta$ 40/A $\beta$ 42 fibrillogenesis at different concentrations.
- fig. S6. The inhibition effect of the metallohelices on A $\beta$ 40 aggregation measured by SDS-PAGE.
- fig. S7. The influence of A1 and B4 on the second structures of A $\beta$ 42 monitored by CD.
- fig. S8. Fluorescence titration of A $\beta$ 40 (3  $\mu$ M) with various concentrations of metallohelices in 20 mM tris buffer.
- fig. S9. ITC data for the A $\beta$ 40 titrations with metallohelices.
- fig. S10. SDS-PAGE analysis of the effect of metallohelices on tryptic digests of A $\beta$ 12–28.
- fig. S11. The aggregation kinetics of A $\beta$ 25–35 was monitored by the fluorescence of ThT in the absence or presence of A1 and B4.
- fig. S12. FTIR spectra of A $\beta$ 40 in different conditions.
- fig. S13. Structures of A $\beta$ 40 and metallohelices used for docking study.
- fig. S14. Energy-minimized average models of A1 with A $\beta$ 40 interactions.
- fig. S15. A1 and B4 scavenging ROS monitored by NBT and ABTS methods.

- fig. S16. Cyclic voltammograms corresponding to the  $O_2/O_2^{\cdot -}$  redox couple.
- fig. S17. Effect of the metallohelices on ROS production in PC12 cells.
- fig. S18. Absorption spectra of 5  $\mu$ M metallohelices in water and PBS.
- fig. S19. Effect of A1 and B4 on PC12 cell viability determined by MTT.
- fig. S20. Protection effects of metallohelices on A $\beta$ 40- and A $\beta$ 42-induced cytotoxicity of PC12 cells.
- table S1. IC<sub>50</sub> values of metallohelices A1 and B4 for the inhibition of fibril formation and destabilization of the preformed fibrils.
- table S2. Analysis of fluorescence titration and ITC data.
- table S3. Enthalpy ( $\Delta H$ ), entropy ( $\Delta S$ ), and Gibbs free energy ( $\Delta G$ ) of the binding of A $\beta$  with metallohelices at pH 7.3.

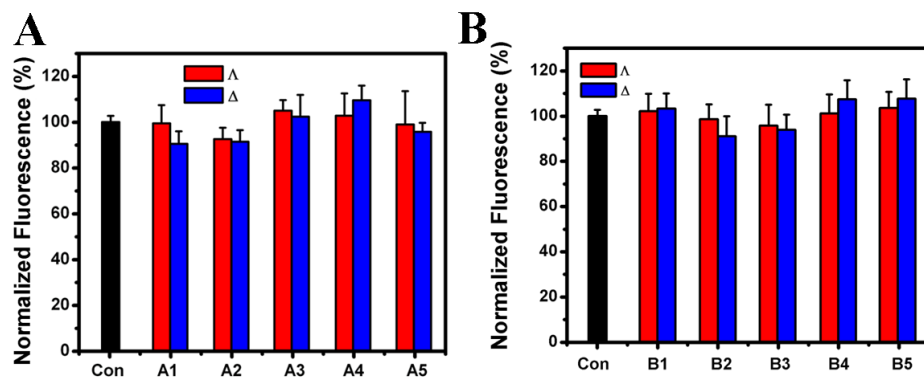

**fig. S1. Influence of these metal complexes on the fluorescence of ECFP (a non-A $\beta$  fusion system).** Values exhibit mean  $\pm$  SD and independent experiments were performed three times.

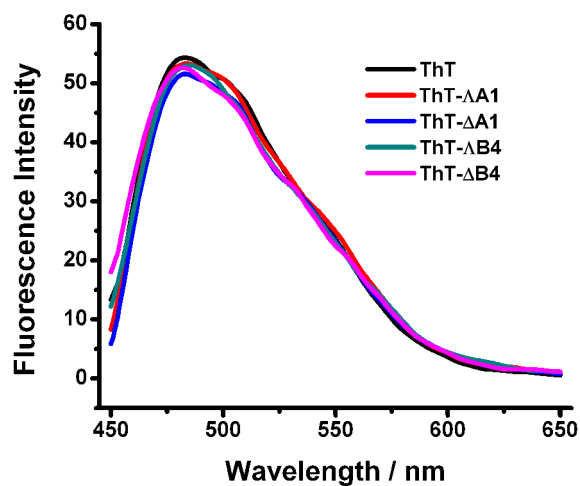

**fig. S2. The influence of these metalhelices on the fluorescence of ThT.**

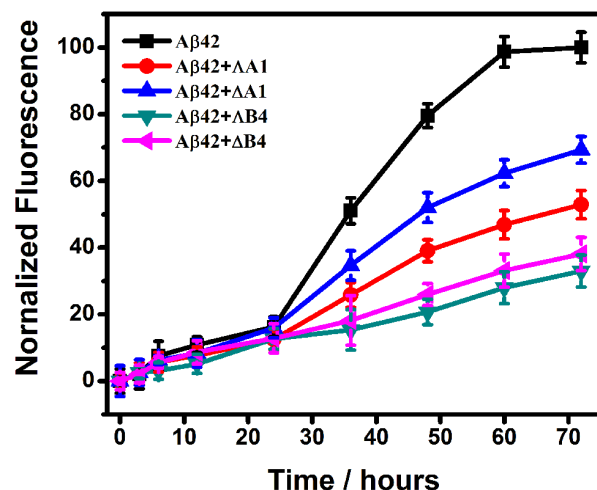

fig. S3. Aggregation kinetics of Aβ42 monitored by ThT assay in the absence or presence of A1 and B4.

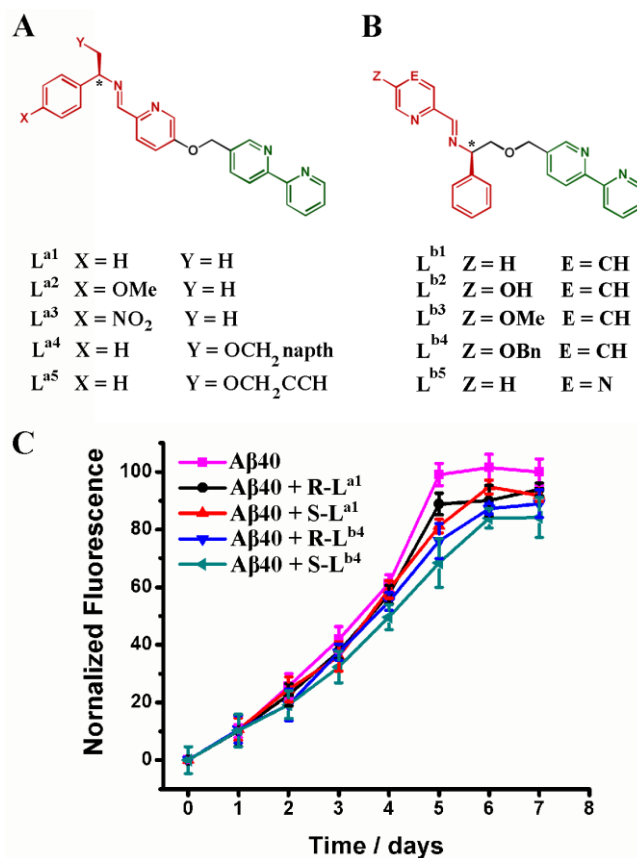

fig. S4. Aggregation kinetics of Aβ40 monitored by ThT assay in the absence or presence of the ligands of A1 and B4. (A, B) The directional ligands of metallohelice enantiomers. The signal of star represents chiral carbon. (C) Fibrillation kinetics of Aβ40 was monitored by the development of thioflavin T binding in the absence or presence of different ligands. [Aβ40] = 50 μM, [ligands] = 10 μM. Values exhibit mean ± SD and independent experiments were performed three times.

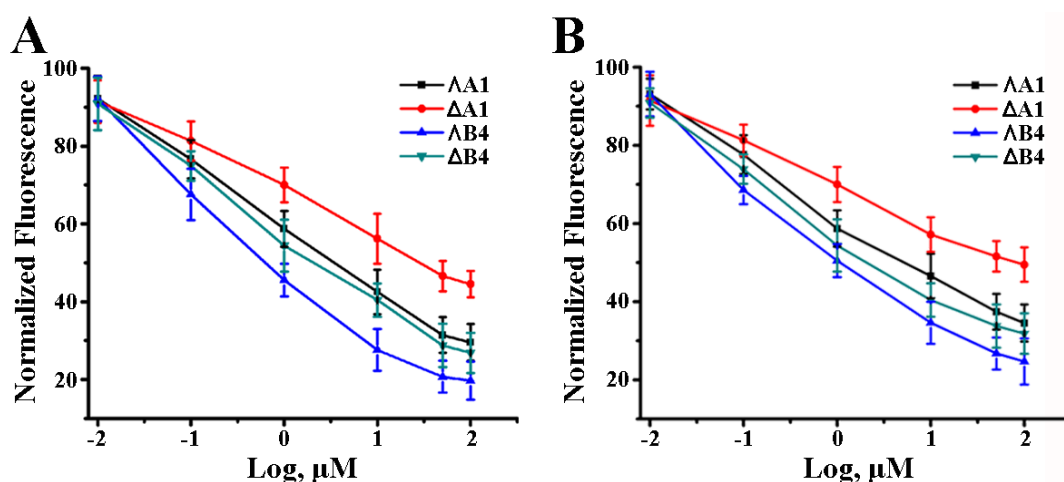

**fig. S5. The inhibition effect of A1 and B4 on Aβ40/Aβ42 fibrillogenesis at different concentrations.** (A) Concentration dependent inhibition of Aβ40 fibrillogenesis by complex A1 and complex B4. (B) Concentration dependent inhibition of Aβ42 fibrillogenesis by metallohelices A1 and metallohelices B4. The concentrations of Aβ40 and Aβ42 were 50 μM. Values exhibit mean ± SD and independent experiments were performed three times.

**table S1. IC<sub>50</sub> values of metallohelices A1 and B4 for the inhibition of fibril formation and destabilization of the preformed fibrils.**

| Metallohelices            |     | IC <sub>50</sub> |                      |
|---------------------------|-----|------------------|----------------------|
|                           |     | Inhibition (μM)  | Destabilization (μM) |
| Asymmetric Metallohelices | ΛA1 | 3.65 ± 0.53      | 3.93 ± 0.67          |
|                           | ΔA1 | 32.29 ± 3.61     | 41.6 ± 5.31          |
|                           | ΛB4 | 0.94 ± 0.17      | 1.21 ± 0.74          |
|                           | ΔB4 | 2.55 ± 0.36      | 2.63 ± 0.52          |
| Symmetric Metallohelices  | Λ1  | 1.69 ± 0.23      | 1.97 ± 0.46          |
|                           | Δ1  | 5.43 ± 0.86      | 8.53 ± 0.71          |
|                           | Λ2  | 6.62 ± 0.58      | 9.82 ± 1.23          |
|                           | Δ2  | 42.21 ± 6.13     | >50                  |

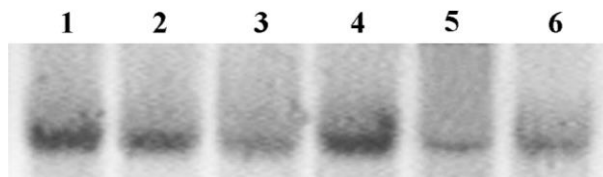

**fig. S6. The inhibition effect of the metallohelices on A $\beta$ 40 aggregation measured by SDS-PAGE.** 1) Control (A $\beta$ 40 monomer), 2) A $\beta$ 40 fibrils, 3) A $\beta$ 40- $\Lambda$ A1, 4) A $\beta$ 40- $\Delta$ A1, 5) A $\beta$ 40- $\Lambda$ B4, 6) A $\beta$ 40- $\Delta$ B4. The samples of 2)~6) were incubated at 37 °C for 7 days and separated by centrifugation. The pellets were resuspended and boiled after the addition of sample buffer. Samples were run on a 12% Tris-tricine SDS gel at 120 V for 1 hour, followed by silver staining.

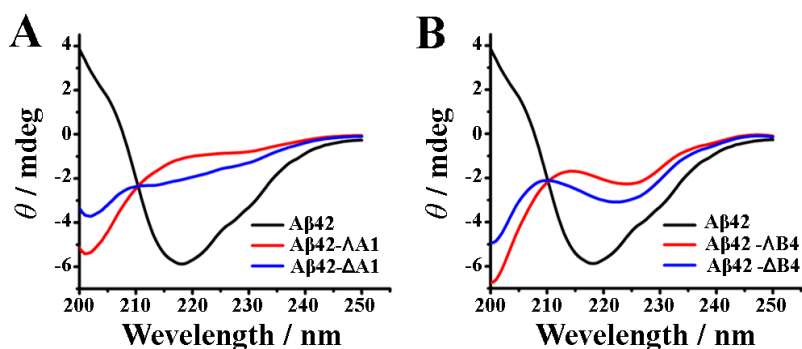

**fig. S7. The influence of A1 and B4 on the second structures of A $\beta$ 42 monitored by CD.** (A) CD spectra of A $\beta$ 42 with or without the incubation of  $\Lambda$ A1 and  $\Delta$ A1, (B) CD spectra of A $\beta$ 42 with or without the incubation of  $\Lambda$ B4 and  $\Delta$ B4.

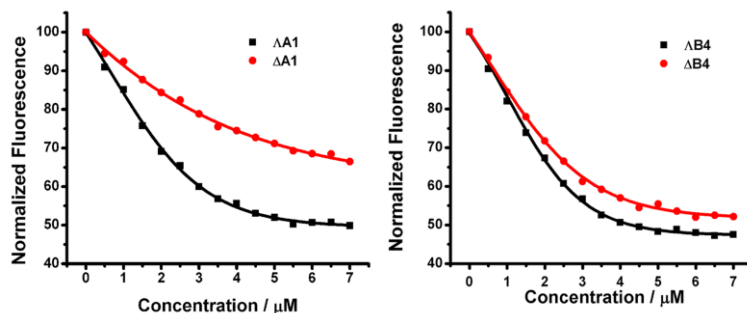

**fig. S8. Fluorescence titration of A $\beta$ 40 (3  $\mu$ M) with various concentrations of metallohelices in 20 mM tris buffer.** The excitation wavelength was 278 nm and the emission intensity at 306 nm was used for analysis.

**table S2. Analysis of fluorescence titration and ITC data.**

| Metallohelices               |              | Titration                     |                                    | ITC                           |                                    |
|------------------------------|--------------|-------------------------------|------------------------------------|-------------------------------|------------------------------------|
|                              |              | $K_a$<br>( $M^{-1}$ )         | $\Delta G_b$<br>( $kJ\ mol^{-1}$ ) | $K_a$<br>( $M^{-1}$ )         | $\Delta G_b$<br>( $kJ\ mol^{-1}$ ) |
| Asymmetric<br>Metallohelices | $\Lambda A1$ | $(4.19 \pm 0.88) \times 10^6$ | $-37.78 \pm 3.52$                  | $(4.93 \pm 0.48) \times 10^6$ | $-38.18 \pm 3.28$                  |
|                              | $\Delta A1$  | $(4.71 \pm 0.92) \times 10^5$ | $-32.36 \pm 2.62$                  | $(5.36 \pm 1.03) \times 10^5$ | $-32.68 \pm 2.66$                  |
| Metallohelices               | $\Lambda B4$ | $(8.43 \pm 1.37) \times 10^6$ | $-39.51 \pm 2.71$                  | $(8.41 \pm 1.55) \times 10^6$ | $-39.50 \pm 3.76$                  |
|                              | $\Delta B4$  | $(3.64 \pm 0.43) \times 10^6$ | $-37.43 \pm 2.24$                  | $(3.01 \pm 0.29) \times 10^6$ | $-36.96 \pm 2.07$                  |
| Symmetric<br>Metallohelices  | $\Lambda 1$  | $(3.81 \pm 0.64) \times 10^6$ | $-37.54 \pm 2.40$                  |                               |                                    |
|                              | $\Delta 1$   | $(9.62 \pm 2.72) \times 10^5$ | $-34.13 \pm 3.05$                  |                               |                                    |
| Metallohelices               | $\Lambda 2$  | $(1.04 \pm 0.26) \times 10^6$ | $-34.33 \pm 3.03$                  |                               |                                    |
|                              | $\Delta 2$   | $(1.97 \pm 0.38) \times 10^5$ | $-30.20 \pm 2.26$                  |                               |                                    |

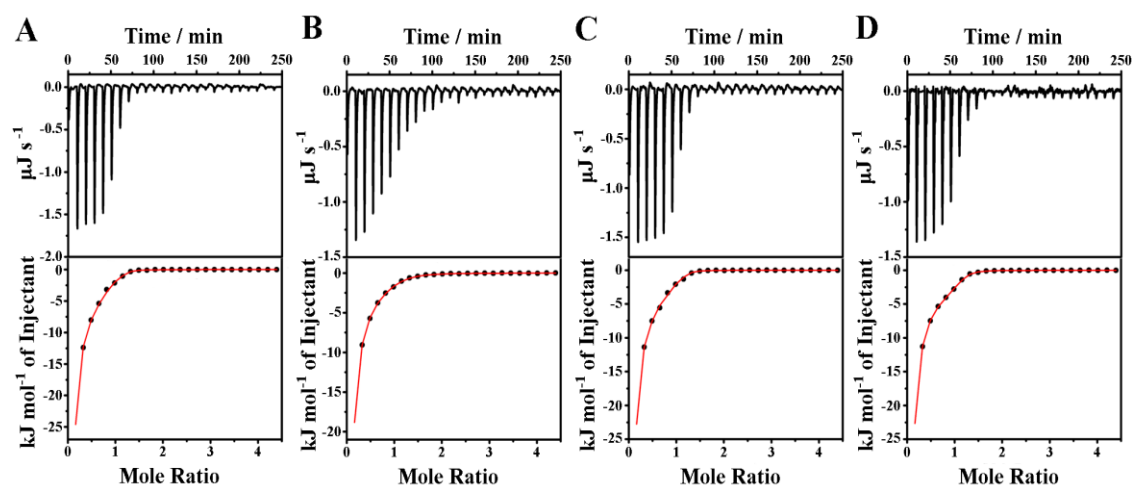**fig. S9. ITC data for the A $\beta$ 40 titrations with metallohelices. (A)  $\Lambda A1$ , (B)  $\Delta A1$ , (C)  $\Lambda B4$ , and (D)  $\Delta B$ .****table S3. Enthalpy ( $\Delta H$ ), entropy ( $\Delta S$ ), and Gibbs free energy ( $\Delta G$ ) of the binding of A $\beta$  with metallohelices at pH 7.3.**

| Sample       | $\Delta H$<br>( $KJ/mol$ ) | $T\Delta S$<br>( $KJ/mol$ ) | $\Delta G = \Delta H - T\Delta S$<br>( $KJ/mol$ ) | $K_a$<br>( $M^{-1}$ )         |
|--------------|----------------------------|-----------------------------|---------------------------------------------------|-------------------------------|
| $\Lambda A1$ | -24.93                     | 13.26                       | -38.19                                            | $(4.93 \pm 0.48) \times 10^6$ |
| $\Delta A1$  | -20.98                     | 11.71                       | -32.69                                            | $(5.36 \pm 1.03) \times 10^5$ |
| $\Lambda B4$ | -22.94                     | 16.58                       | -39.52                                            | $(8.41 \pm 1.55) \times 10^6$ |
| $\Delta B4$  | -23.08                     | 13.89                       | -36.97                                            | $(3.01 \pm 0.29) \times 10^6$ |

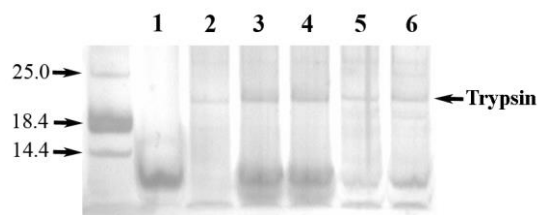

**fig. S10. SDS-PAGE analysis of the effect of metallohelices on tryptic digests of A $\beta$ 12–28.** 1) A $\beta$ 12-28 alone, 2) A $\beta$ 12-28 digested by trypsin, 3)  $\Delta$ B4–A $\beta$ 12-28 digested by trypsin, 4)  $\Delta$ B4–A $\beta$ 12-28 digested by trypsin, 5)  $\Delta$ A1–A $\beta$ 12-28 digested by trypsin, 6)  $\Delta$ A1–A $\beta$ 12-28 digested by trypsin.

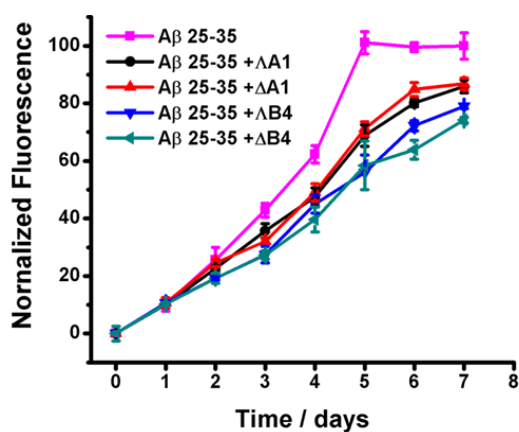

**fig. S11. The aggregation kinetics of A $\beta$ 25–35 was monitored by the fluorescence of ThT in the absence or presence of A1 and B4.** The concentration of A $\beta$ 25-35 was 50  $\mu$ M, and the concentrations of metallohelices were 10  $\mu$ M. Values exhibit mean  $\pm$  SD and independent experiments were performed three times.



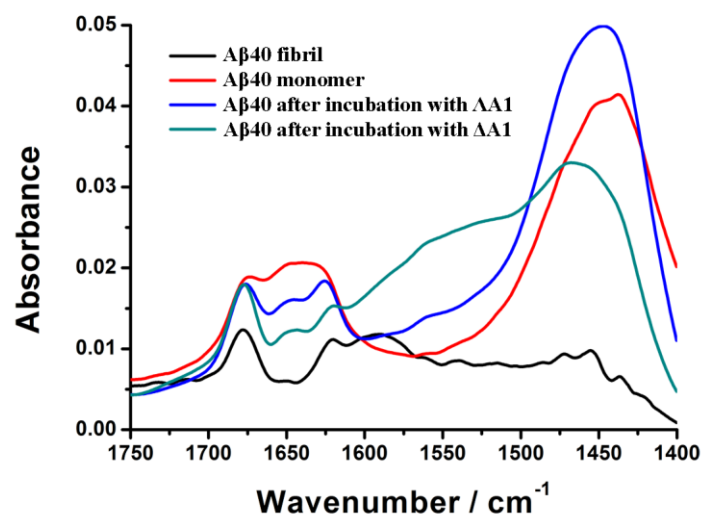

**fig. S12. FTIR spectra of A $\beta$ 40 in different conditions.** (For samples of A $\beta$ 40 fibril and monomer in water media, spectra of water are subtracted. For samples of A $\beta$ 40 with  $\Delta$ A1 and  $\Delta$ A1 treatment, spectra of metallohelices in water are subtracted.)

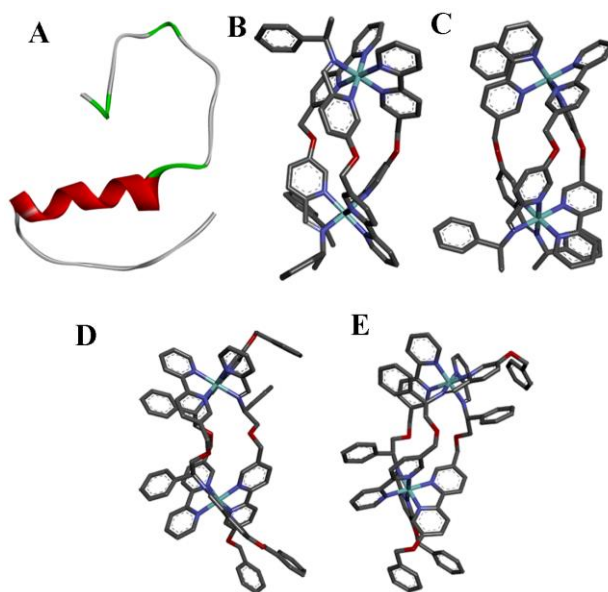

**fig. S13. Structures of A $\beta$ 40 and metallohelices used for docking study.** Structures of (A) A $\beta$ 40, (B)  $\Delta$ A1, (C)  $\Delta$ A1, (D)  $\Delta$ B4 and (E)  $\Delta$ B4 used for docking study.

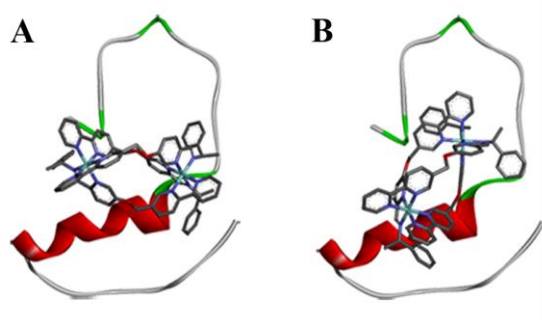

**fig. S14. Energy-minimized average models of A1 with A $\beta$ 40 interactions.**

Energy-minimized average models of (A)  $\Delta$ A1, and (B)  $\Delta$ A1 with A $\beta$ 40 interactions.

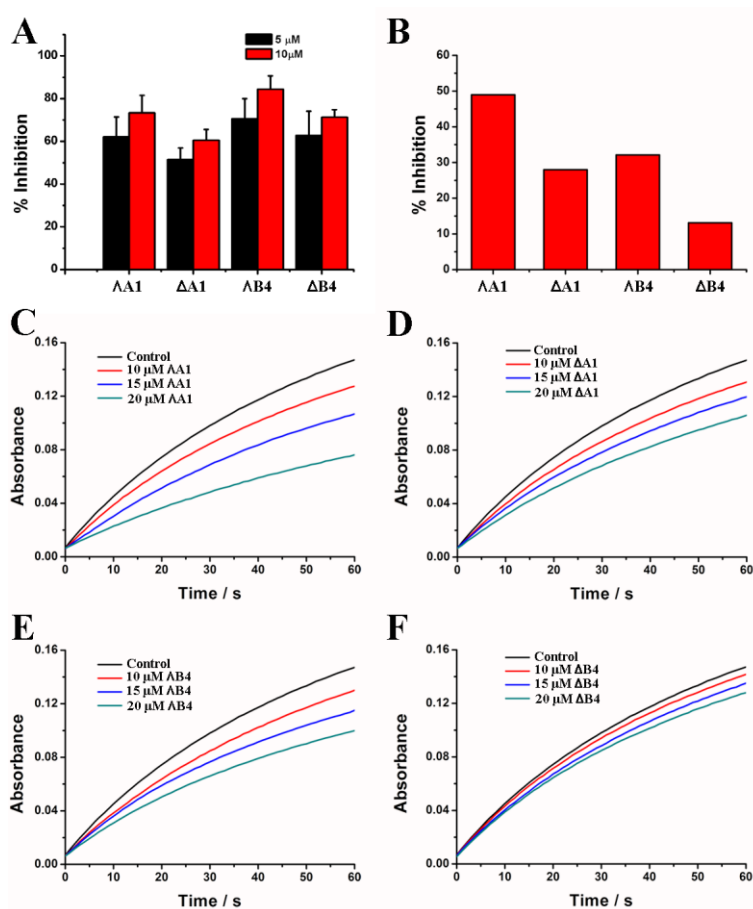

**fig. S15. A1 and B4 scavenging ROS monitored by NBT and ABTS methods. (A)**

Percent inhibition of NBT oxidation by superoxide radicals generated in the riboflavin–NBT–light system in vitro assessed by NBT<sup>+</sup> absorption at 560 nm with metallohelices A1 and B4. Values exhibit mean  $\pm$  SD and independent experiments were performed three times. (B) Percent inhibition of ABTS oxidation by metallohelices A1 and B4. (C–D) Oxidation of ABTS was inhibited by metallohelices  $\Delta$ A1,  $\Delta$ A1,  $\Delta$ B4, and  $\Delta$ B4 at difference concentration.

(C–D) Oxidation of ABTS was inhibited by metallohelices  $\Delta$ A1,  $\Delta$ A1,  $\Delta$ B4, and  $\Delta$ B4 at difference concentration.

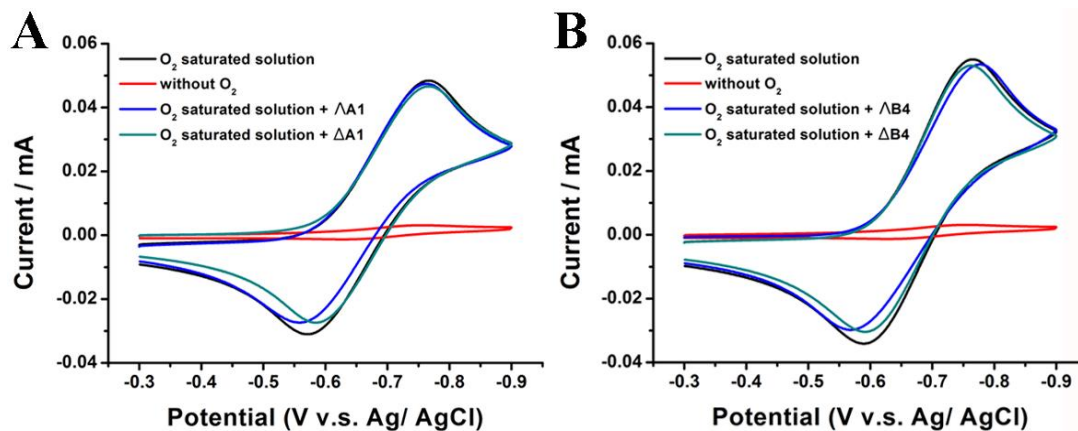

**fig. S16. Cyclic voltammograms corresponding to the  $O_2/O_2^{\bullet-}$  redox couple. (A)** The reactivity of  $\Delta A1$  and  $\Delta A1$  with superoxide. **(B)** The reactivity of  $\Delta B4$  and  $\Delta B4$  with superoxide. Sweep rate:  $0.1 \text{ Vs}^{-1}$ . Electrolytic media: DMSO + 0.1M TBAHFP (tetrabutylammonium hexafluoro phosphate).

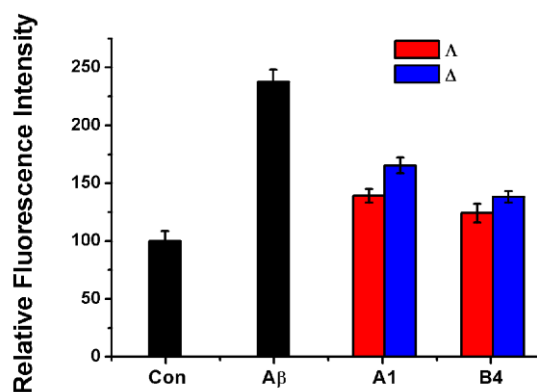

**fig. S17. Effect of the metallohelices on ROS production in PC12 cells.** Cells were treated with aged  $A\beta_{40}$  at a concentration of  $5 \mu\text{M}$  in the absence or presence of increasing concentration of metallohelices, and 12 h later ROS generation inside the cells was measured using dichlorodihydrofluorescein (DCF) fluorescence. Values exhibit mean  $\pm$  SD and independent experiments were performed three times.

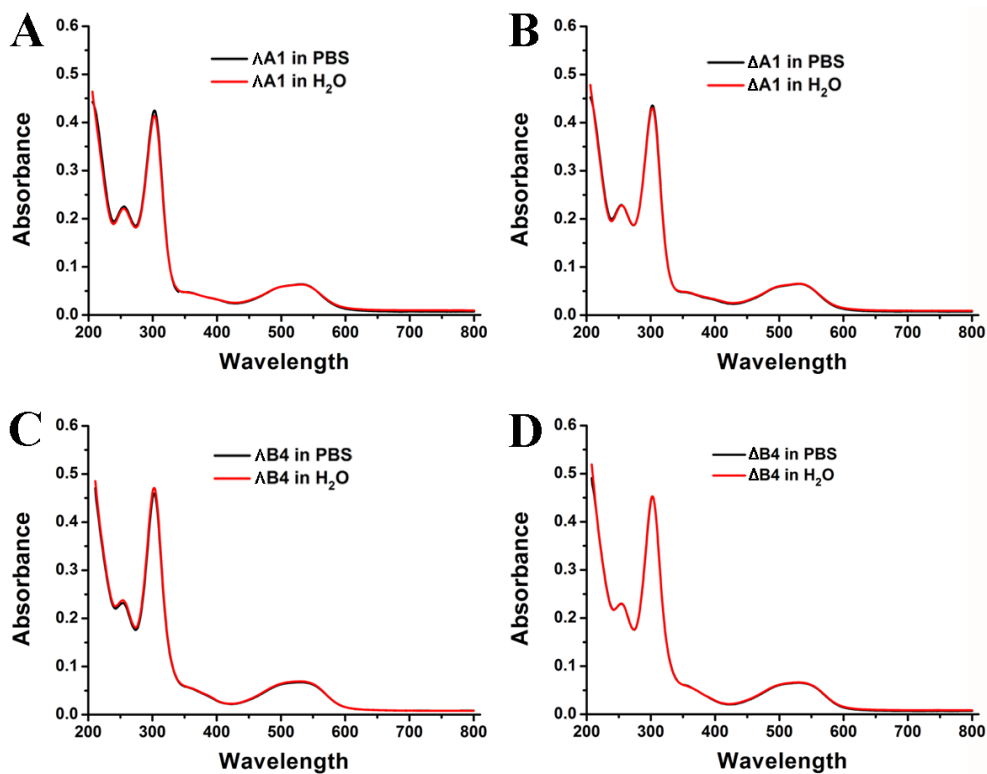

**fig. S18.** Absorption spectra of 5  $\mu\text{M}$  metallohelices in water and PBS. (A)  $\Delta\text{A1}$ , (B)  $\Delta\text{A1}$ , (C)  $\Delta\text{B4}$ , (D)  $\Delta\text{B4}$ .

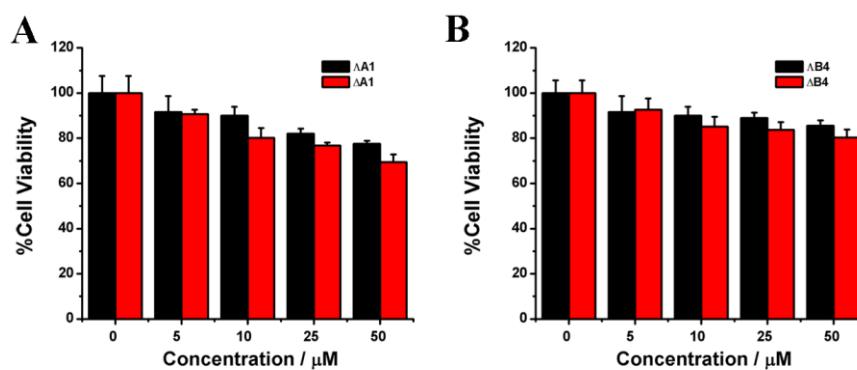

**fig. S19.** Effect of A1 and B4 on PC12 cell viability determined by MTT. Effect of (A) metallohelices A1 and (B) B4 on PC12 cell viability determined by MTT method. Values exhibit mean  $\pm$  SD and independent experiments were performed three times.

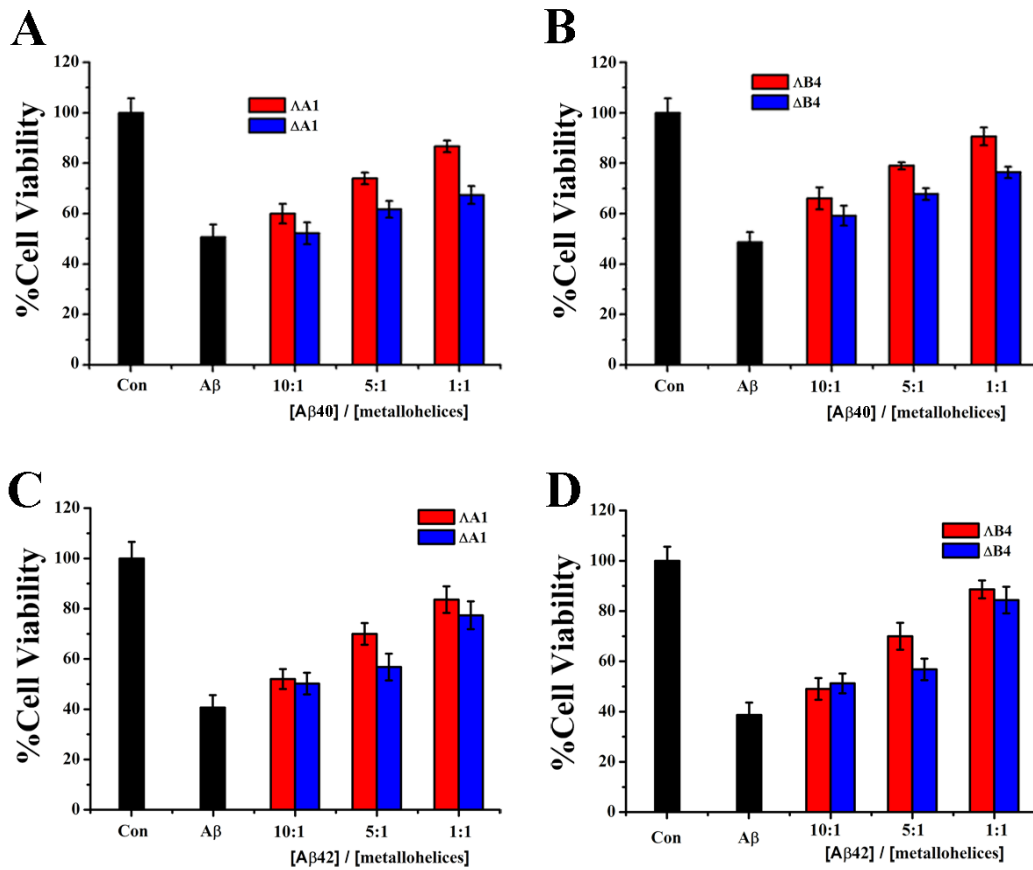

**fig. S20. Protection effects of metallothelices on Aβ40- and Aβ42-induced cytotoxicity of PC12 cells.** The concentration of Aβ40 was 5 μM. Values exhibit mean ± SD and independent experiments were performed three times.
